# Supplementary material for: PINCH1 Promotes Fibroblast Migration in Extracellular Matrices and Influences Their Mechanophenotype
Source: PubMed Central journal article supplement (PMC9149598; doi:10.3389/fcell.2022.869563), 2022-05-16
Supplement: DataSheet1.pdf [file DataSheet1.pdf]

## Supplementary Material

**Supplementary Figure 1.** Elastic modulus and viscosity of PINCH1<sup>-/-</sup> and PINCH1<sup>fl/fl</sup> cells in the presence of DMSO (control) or inhibitory drug, such as 0.4 μM Latrunculin A, 100 μM Blebbistatin or 100 μM CK666., based on the application of the Kelvin-Voigt model on the optical cell stretcher data.

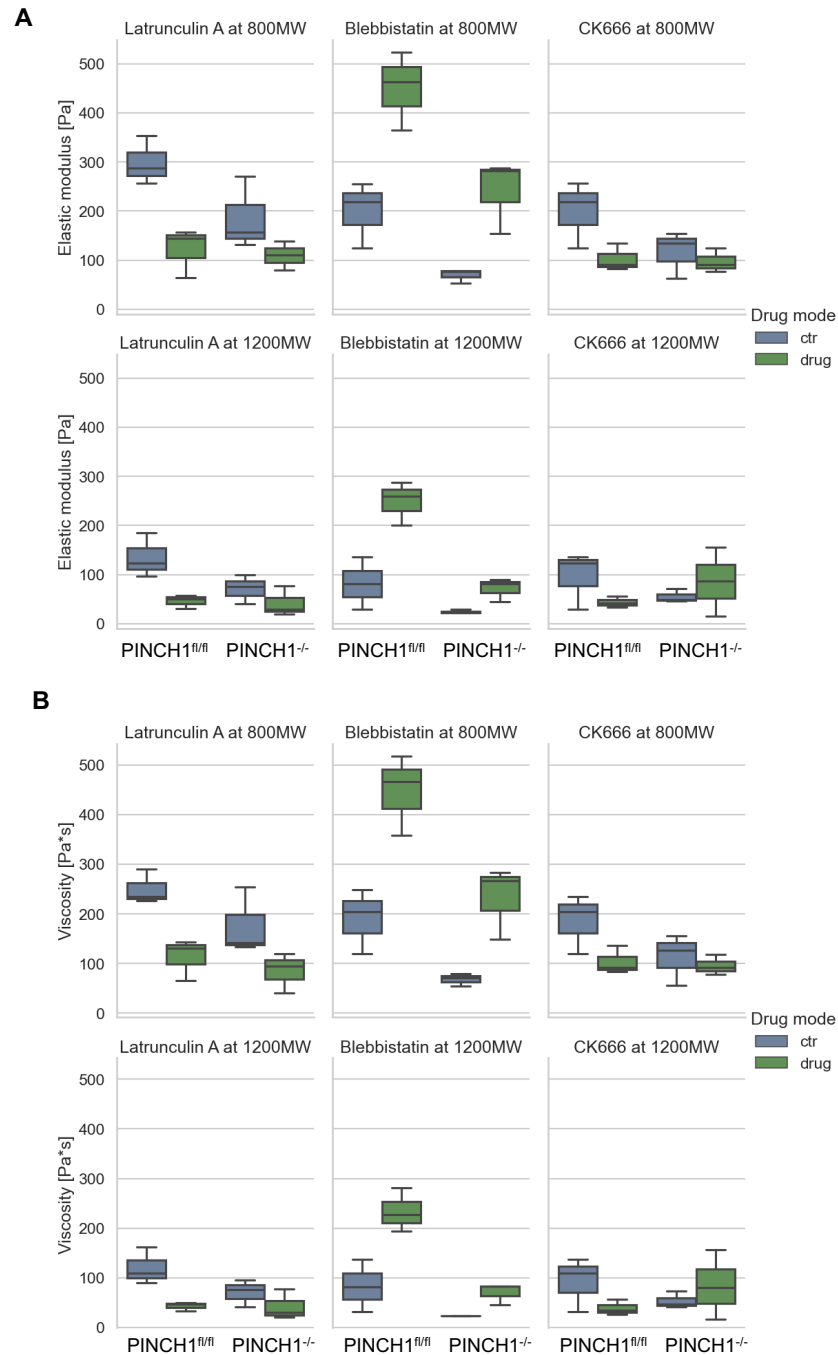

**Supplementary Figure 2.** The Proxy for Poisson ratio (short axis over long axis of figure 4 in the manuscript) is provided for PINCH1<sup>-/-</sup> cells and PINCH1<sup>fl/fl</sup> cells in the presence of DMSO (control, blue) or Latrunculin A (orange). The data are presented as median values  $\pm$  SD.

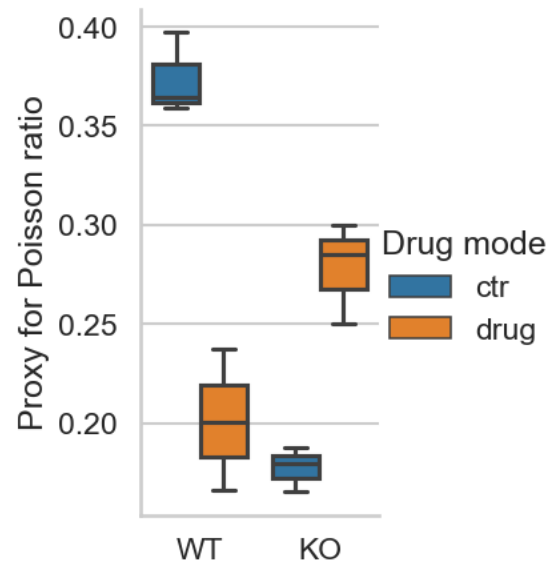

**Supplementary Figure 3.** The Proxy for the Poisson ratio has been plotted for the first 500 measured cells and the last 500 cells of the optical deformability analysis in the presence of pharmaceutical drugs, such as 0.4  $\mu\text{M}$  Latrunculin A, 100  $\mu\text{M}$  Blebbistatin and 100  $\mu\text{M}$  CK666. There are no significant changes in the Proxy for the Poisson ratio of the 0-500 measured cells (initial phase of the analysis) and the 500-1000 measured cells (final phase of the analysis) for the different conditions.

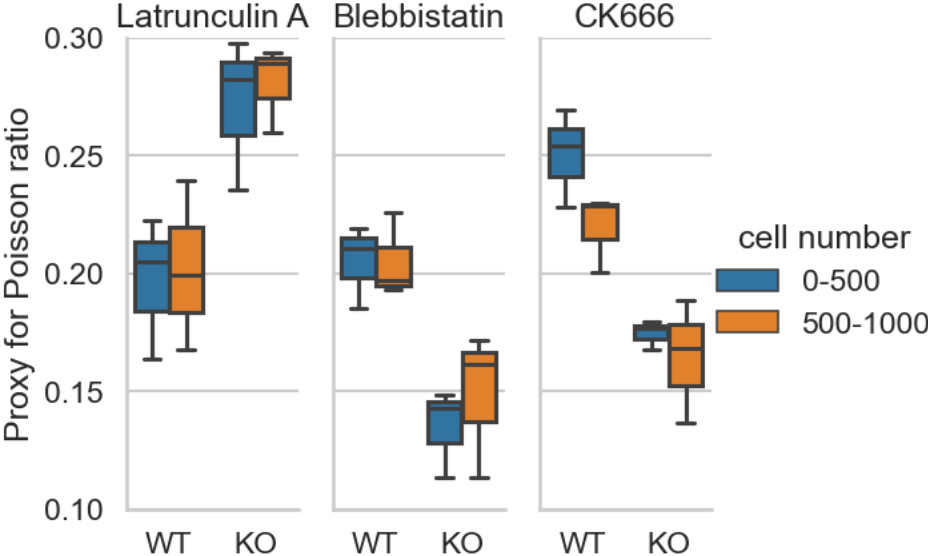

**Supplementary Table 1.** Statistical analysis of the optical cell stretcher data using the Kruskal-Wallis test.

| Drug          | Laser power | Value                          | p-value     | Statistics  | Significance |
|---------------|-------------|--------------------------------|-------------|-------------|--------------|
| Blebbistatin  | 800         | Long axis deformation EoS [%]  | 6,7595E-135 | 623,8636134 | ***          |
|               |             | Short axis deformation EoS [%] | 5,8753E-69  | 319,5367488 | ***          |
|               | 1200        | Long axis deformation EoS [%]  | 5,3925E-173 | 799,5594071 | ***          |
|               |             | Short axis deformation EoS [%] | 1,43292E-18 | 86,20155686 | ***          |
| Latrunculin A | 800         | Long axis deformation EoS [%]  | 1,11415E-70 | 327,4916915 | ***          |
|               |             | Short axis deformation EoS [%] | 4,10549E-40 | 186,1678787 | ***          |
|               | 1200        | Long axis deformation EoS [%]  | 1,1674E-275 | 1272,81128  | ***          |
|               |             | Short axis deformation EoS [%] | 1,63596E-78 | 363,6689473 | ***          |
| CK666         | 800         | Long axis deformation EoS [%]  | 7,80689E-46 | 212,6451962 | ***          |
|               |             | Short axis deformation EoS [%] | 2,37121E-28 | 131,6616406 | ***          |
|               | 1200        | Long axis deformation EoS [%]  | 2,1312E-105 | 487,7718834 | ***          |
|               |             | Short axis deformation EoS [%] | 2,8177E-09  | 42,72311956 | ***          |

**Supplementary Table 2.** Statistical analysis of the optical cell stretcher data using Mann-Whitney-U test.

| drug         | laser power | value                          | sample a           | sample b           | p-value     | statistic | significance |
|--------------|-------------|--------------------------------|--------------------|--------------------|-------------|-----------|--------------|
| Blebbistatin | 800         | Long axis deformation EoS [%]  | WT Blebb ctr 100µM | WT Blebb 100µM     | 4,18693E-37 | 1681381,5 | ***          |
|              |             | Long axis deformation EoS [%]  | KO Blebb ctr 100µM | KO Blebb 100µM     | 1,37452E-47 | 1823379   | ***          |
|              |             | Long axis deformation EoS [%]  | WT Blebb ctr 100µM | KO Blebb ctr 100µM | 4,76454E-36 | 1095942   | ***          |
|              |             | Long axis deformation EoS [%]  | WT Blebb 100µM     | KO Blebb 100µM     | 7,89807E-31 | 993989,5  | ***          |
|              |             | Short axis deformation EoS [%] | WT Blebb ctr 100µM | WT Blebb 100µM     | 5,95099E-35 | 1004248   | ***          |
|              |             | Short axis deformation EoS [%] | KO Blebb ctr 100µM | KO Blebb 100µM     | 0,000187371 | 1309829   | ***          |
|              |             | Short axis deformation EoS [%] | WT Blebb ctr 100µM | KO Blebb ctr 100µM | 5,9788E-40  | 1075980   | ***          |
|              |             | Short axis deformation EoS [%] | WT Blebb 100µM     | KO Blebb 100µM     | 0,000308196 | 1203724,5 | **           |
|              | 1200        | Long axis deformation EoS [%]  | WT Blebb ctr 100µM | WT Blebb 100µM     | 3,09875E-25 | 1505401,5 | ***          |
|              |             | Long axis deformation EoS [%]  | KO Blebb ctr 100µM | KO Blebb 100µM     | 4,44412E-33 | 1763223   | ***          |
|              |             | Long axis deformation EoS [%]  | WT Blebb ctr 100µM | KO Blebb ctr 100µM | 4,31613E-86 | 881423    | ***          |
|              |             | Long axis deformation EoS [%]  | WT Blebb 100µM     | KO Blebb 100µM     | 1,98875E-55 | 826849,5  | ***          |
|              |             | Short axis deformation EoS [%] | WT Blebb ctr 100µM | WT Blebb 100µM     | 2,43088E-09 | 1087980   | ***          |
|              |             | Short axis deformation EoS [%] | KO Blebb ctr 100µM | KO Blebb 100µM     | 0,725676119 | 1414040,5 | n.s.         |
|              |             | Short axis deformation EoS [%] | WT Blebb ctr 100µM | KO Blebb ctr 100µM | 1,28094E-15 | 1215255   | ***          |
|              |             | Short axis deformation EoS [%] | WT Blebb 100µM     | KO Blebb 100µM     | 0,092393371 | 1180593   | n.s.         |
| atrunculin   | 800         | Long axis deformation EoS [%]  | WT LatA ctr 0.4µM  | WT LatA 0.4µM      | 5,072E-31   | 1024622,5 | ***          |
|              |             | Long axis deformation EoS [%]  | KO LatA ctr 0.4µM  | KO LatA 0.4µM      | 0,03286488  | 1285218   | n.s.         |
|              |             | Long axis deformation EoS [%]  | WT LatA ctr 0.4µM  | KO LatA ctr 0.4µM  | 1,6889E-45  | 933167,5  | ***          |
|              |             | Long axis deformation EoS [%]  | WT LatA 0.4µM      | KO LatA 0.4µM      | 2,08995E-10 | 1196737   | ***          |
|              |             | Short axis deformation EoS [%] | WT LatA ctr 0.4µM  | WT LatA 0.4µM      | 1,57814E-29 | 1032682   | ***          |
|              |             | Short axis deformation EoS [%] | KO LatA ctr 0.4µM  | KO LatA 0.4µM      | 1,28724E-14 | 1551865,5 | ***          |
|              |             | Short axis deformation EoS [%] | WT LatA ctr 0.4µM  | KO LatA ctr 0.4µM  | 1,27941E-23 | 1043218,5 | ***          |
|              |             | Short axis deformation EoS [%] | WT LatA 0.4µM      | KO LatA 0.4µM      | 6,06701E-19 | 1616361,5 | ***          |
|              | 1200        | Long axis deformation EoS [%]  | WT LatA ctr 0.4µM  | WT LatA 0.4µM      | 6,96483E-90 | 860144    | ***          |
|              |             | Long axis deformation EoS [%]  | KO LatA ctr 0.4µM  | KO LatA 0.4µM      | 1,65458E-37 | 1047868   | ***          |
|              |             | Long axis deformation EoS [%]  | WT LatA ctr 0.4µM  | KO LatA ctr 0.4µM  | 1,4742E-113 | 724220,5  | ***          |
|              |             | Long axis deformation EoS [%]  | WT LatA 0.4µM      | KO LatA 0.4µM      | 4,63431E-82 | 941358,5  | ***          |
|              |             | Short axis deformation EoS [%] | WT LatA ctr 0.4µM  | WT LatA 0.4µM      | 8,29752E-08 | 1279085,5 | ***          |
|              |             | Short axis deformation EoS [%] | KO LatA ctr 0.4µM  | KO LatA 0.4µM      | 2,34852E-59 | 1863519,5 | ***          |
|              |             | Short axis deformation EoS [%] | WT LatA ctr 0.4µM  | KO LatA ctr 0.4µM  | 2,11726E-10 | 1163865   | ***          |
|              |             | Short axis deformation EoS [%] | WT LatA 0.4µM      | KO LatA 0.4µM      | 5,6677E-54  | 1965934,5 | ***          |
| CK666        | 800         | Long axis deformation EoS [%]  | WT CK666 ctr 100µM | WT CK666 100µM     | 4,03124E-36 | 1173200   | ***          |
|              |             | Long axis deformation EoS [%]  | KO CK666 ctr 100µM | KO CK666 100µM     | 0,001162329 | 1562888   | **           |
|              |             | Long axis deformation EoS [%]  | WT CK666 ctr 100µM | KO CK666 ctr 100µM | 2,81094E-35 | 1084973   | ***          |
|              |             | Long axis deformation EoS [%]  | WT CK666 100µM     | KO CK666 100µM     | 0,008331728 | 1666148   | *            |
|              |             | Short axis deformation EoS [%] | WT CK666 ctr 100µM | WT CK666 100µM     | 0,042872679 | 1491304   | n.s.         |
|              |             | Short axis deformation EoS [%] | KO CK666 ctr 100µM | KO CK666 100µM     | 0,000393634 | 1366097   | **           |
|              |             | Short axis deformation EoS [%] | WT CK666 ctr 100µM | KO CK666 ctr 100µM | 4,27835E-12 | 1240909,5 | ***          |
|              |             | Short axis deformation EoS [%] | WT CK666 100µM     | KO CK666 100µM     | 1,52169E-16 | 1331794,5 | ***          |
|              | 1200        | Long axis deformation EoS [%]  | WT CK666 ctr 100µM | WT CK666 100µM     | 1,01879E-10 | 1285452   | ***          |
|              |             | Long axis deformation EoS [%]  | KO CK666 ctr 100µM | KO CK666 100µM     | 1,08619E-16 | 1645724   | ***          |
|              |             | Long axis deformation EoS [%]  | WT CK666 ctr 100µM | KO CK666 ctr 100µM | 8,86612E-89 | 915365    | ***          |
|              |             | Long axis deformation EoS [%]  | WT CK666 100µM     | KO CK666 100µM     | 4,80169E-13 | 1182318   | ***          |
|              |             | Short axis deformation EoS [%] | WT CK666 ctr 100µM | WT CK666 100µM     | 6,42397E-08 | 1316160   | ***          |
|              |             | Short axis deformation EoS [%] | KO CK666 ctr 100µM | KO CK666 100µM     | 0,02507332  | 1349185   | n.s.         |
|              |             | Short axis deformation EoS [%] | WT CK666 ctr 100µM | KO CK666 ctr 100µM | 0,000135056 | 1392128,5 | ***          |
|              |             | Short axis deformation EoS [%] | WT CK666 100µM     | KO CK666 100µM     | 0,589600539 | 1367647   | n.s.         |

**Supplementary Table 3.** Statistical analysis of the percentage of invasive cell data using Mann-Whitney-U test.

|          | value              | drug          | p-value  | statistic | significance |
|----------|--------------------|---------------|----------|-----------|--------------|
| <b>0</b> | Invasive cells [%] | Blebbistatin  | 1,01E-11 | 54,212    | ***          |
| <b>1</b> | Invasive cells [%] | Latrunculin A | 5,82E-11 | 50,64564  | ***          |
| <b>2</b> | Invasive cells [%] | CK666         | 7,06E-12 | 54,94295  | ***          |

**Supplementary Table 4.** Statistical analysis of the invasion depth data using Mann-Whitney-U test.

|          | value                            | drug          | p-value  | statistic | significance |
|----------|----------------------------------|---------------|----------|-----------|--------------|
| <b>0</b> | Invasion depth [ $\mu\text{m}$ ] | Blebbistatin  | 8,74E-12 | 54,50881  | ***          |
| <b>1</b> | Invasion depth [ $\mu\text{m}$ ] | Latrunculin A | 3,44E-12 | 56,40775  | ***          |
| <b>2</b> | Invasion depth [ $\mu\text{m}$ ] | CK666         | 1,01E-11 | 54,21199  | ***          |
